# Supplementary material for: Simulated impacts of vertical distributions of black carbon aerosol on meteorology and PM 2.5 concentrations in Beijing during severe haze events
Source: Copernicus journal article supplement (doi:10.5194/acp-2021-611), 2021-09-06
Supplement: Supplementary file 1 [file acp-2021-611-supplement.pdf]

1 **Simulated impacts of vertical distributions of black carbon**  
2 **aerosol on meteorology and PM<sub>2.5</sub> concentrations in Beijing**  
3 **during severe haze events**

4

5 Donglin Chen<sup>1</sup>, Hong Liao<sup>1\*</sup>, Yang Yang<sup>1</sup>, Lei Chen<sup>1</sup>, Delong Zhao<sup>2</sup>, Deping Ding<sup>2</sup>

6

7 <sup>1</sup>Jiangsu Key Laboratory of Atmospheric Environment Monitoring and Pollution Control, Jiangsu

8 Engineering Technology Research Center of Environmental Cleaning Materials, Collaborative

9 Innovation Center of Atmospheric Environment and Equipment Technology, School of

10 Environmental Science and Engineering, Nanjing University of Information Science &

11 Technology, Nanjing, Jiangsu, China

12 <sup>2</sup>Beijing Weather Modification Office, Beijing 100089, China

13

14

15

16 \*Correspondence to: Hong Liao (hongliao@nuist.edu.cn)

17

18 **Table S1.** The values of *hs* for each flight.

| Flight date and time | <i>hs</i> value |
|----------------------|-----------------|
| 2016/12/11 16:20     | N/A             |
| 2016/12/12 13:05     | 0.82            |
| 2016/12/12 15:39     | 0.96            |
| 2016/12/16 15:47     | 0.53            |
| 2016/12/17 15:59     | 0.35            |
| 2016/12/18 14:22     | 0.79            |
| 2016/12/19 16:09     | 0.48            |

19

20

21

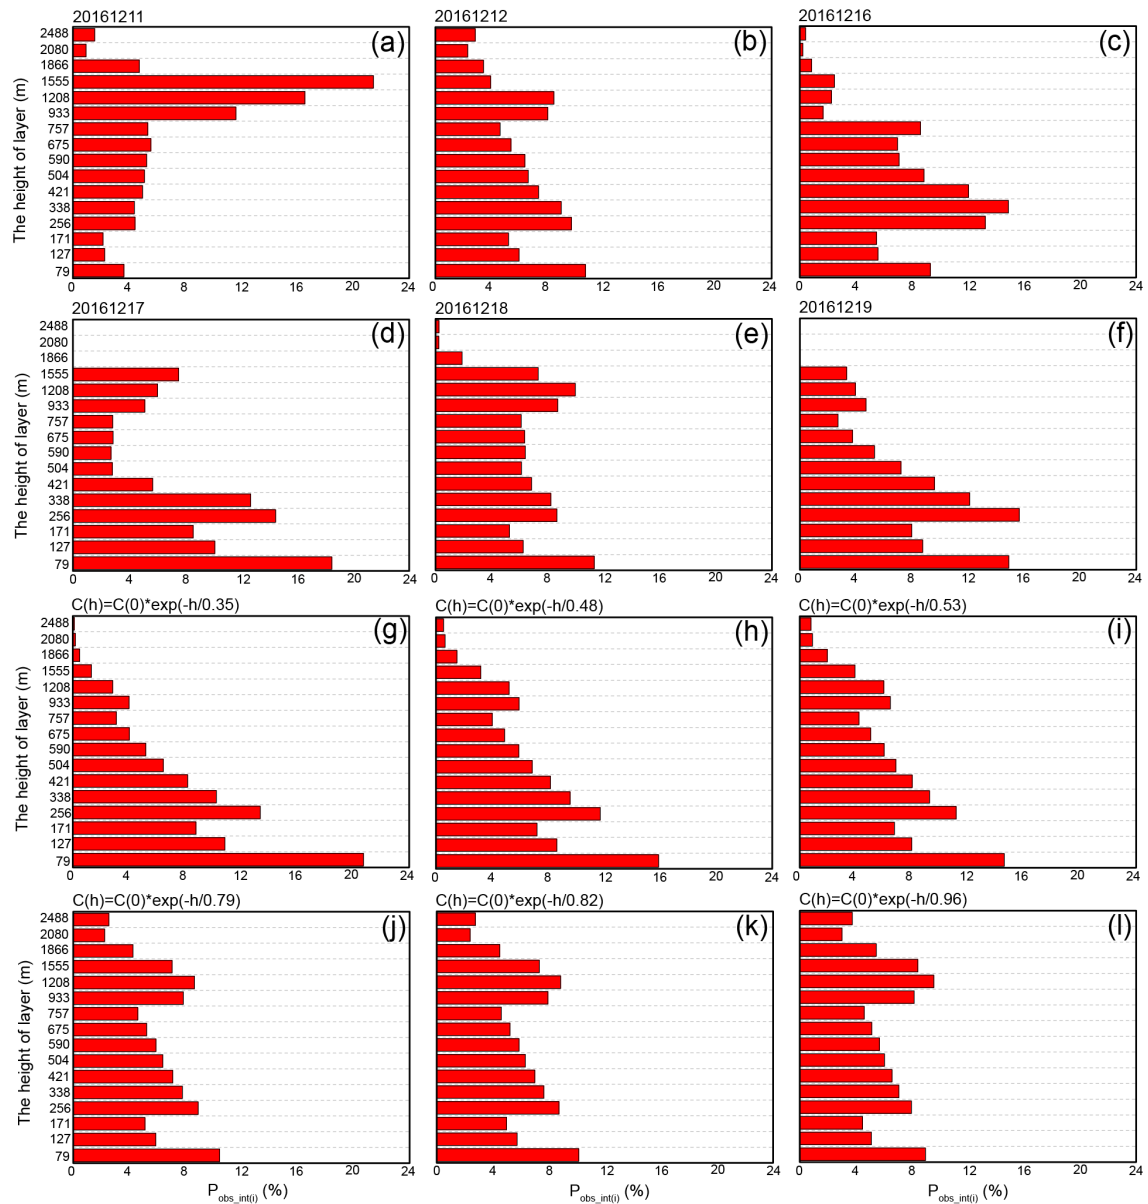

22

23 **Figure S1.** The calculated percentage of BC mass column burden in each layer below  
 24 2488 m in the model during the severe haze events by observed BC vertical profiles (a-  
 25 f) and different exponential decline functions (g-l).

26

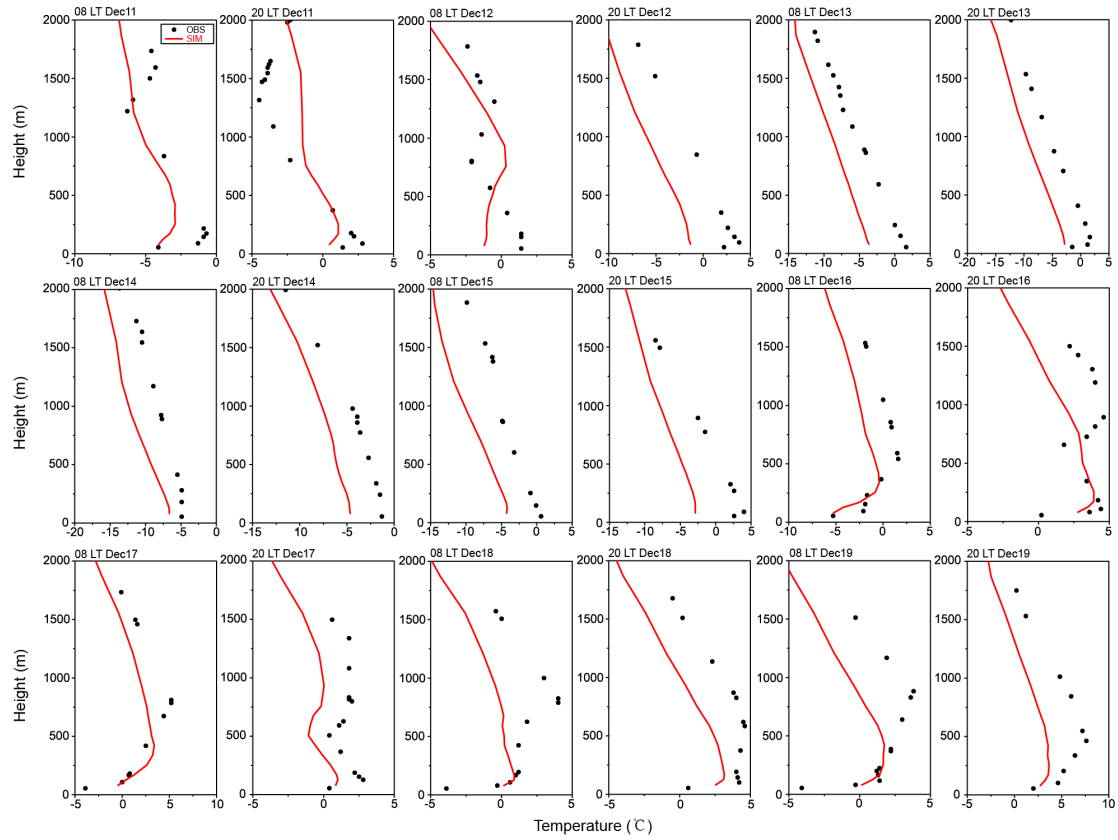

27

28 **Figure S2.** Observed (black dot) and simulated (red line) temperature ( $^{\circ}\text{C}$ ) profiles in  
 29 Beijing at 8 am and 8 pm LT during 11-19 December 2016.

30

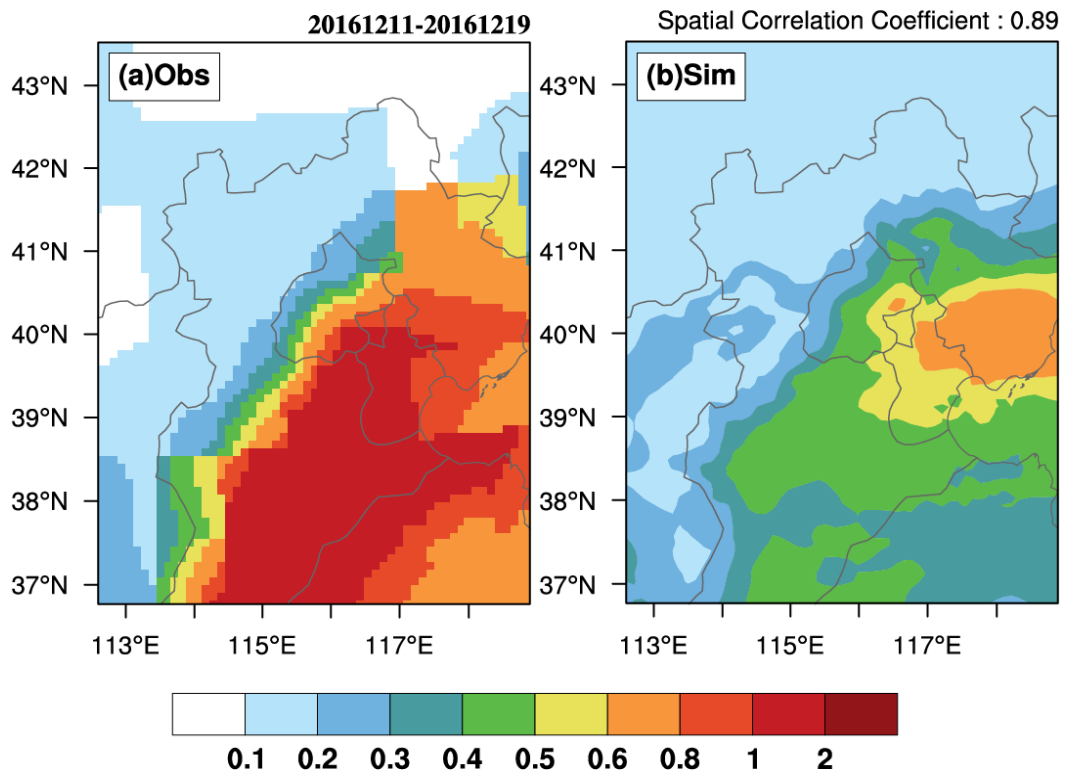

31

32 **Figure S3.** Horizontal distribution of observed and simulated AOD at 550 nm averaged  
 33 11-19 December 2016.

34

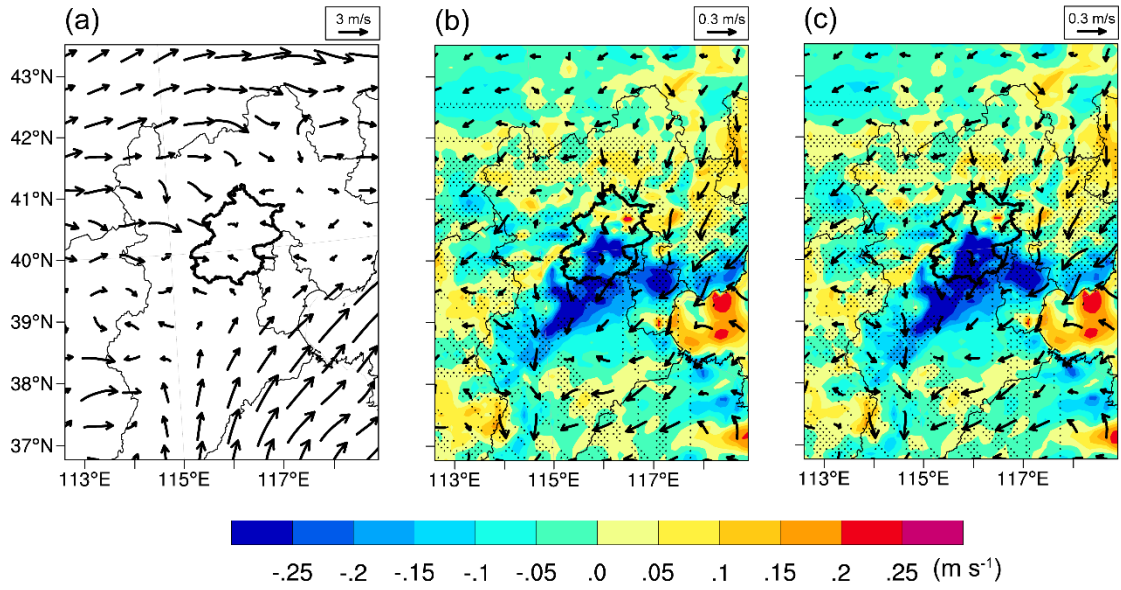

35

36 **Figure S4.** (a) The spatial distribution of wind at 10 m in NoBCrad case averaged two  
 37 haze events. (b-c) The spatial distributions of changes in wind at 10 m due to BC DRE  
 38 with original and modified vertical profiles, respectively. The dotted areas are  
 39 statistically significant at the 95% level, as determined by a two-sample Student's t test.

40

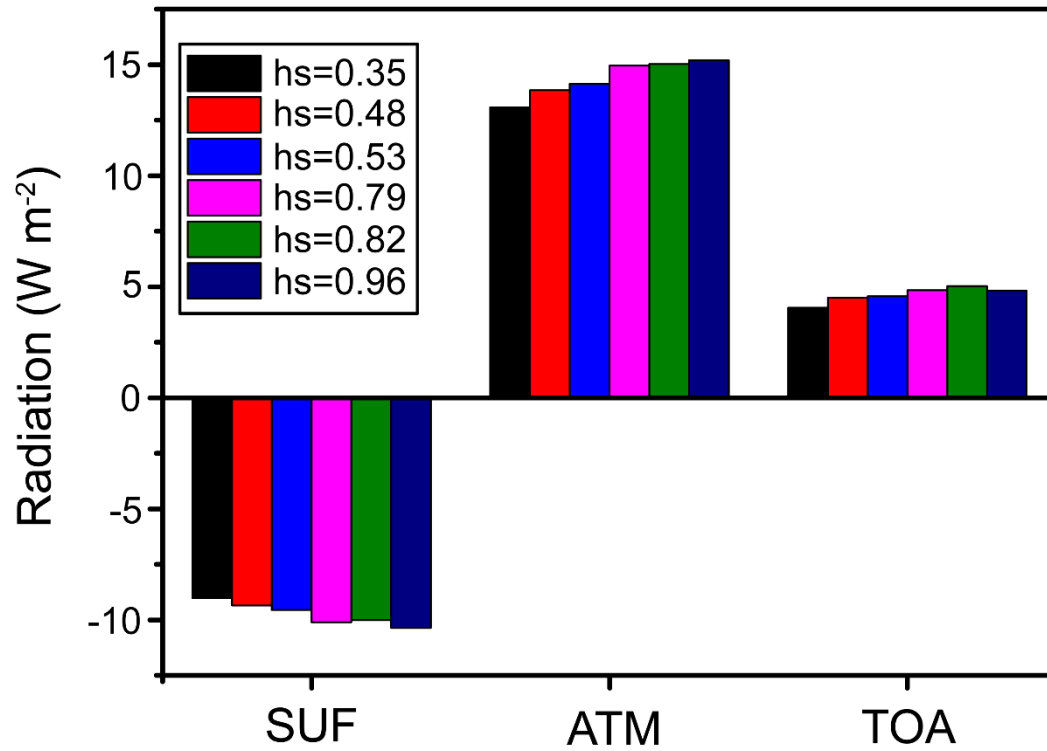

41

42 **Figure S5.** Direct radiations of BC at the surface (SUF), in the atmosphere (ATM) and  
 43 at the top of atmosphere (TOA) in Beijing averaged 12 and 16-19 December in six  
 44 sensitivity experiments (VerBC\_hs1-6).

45

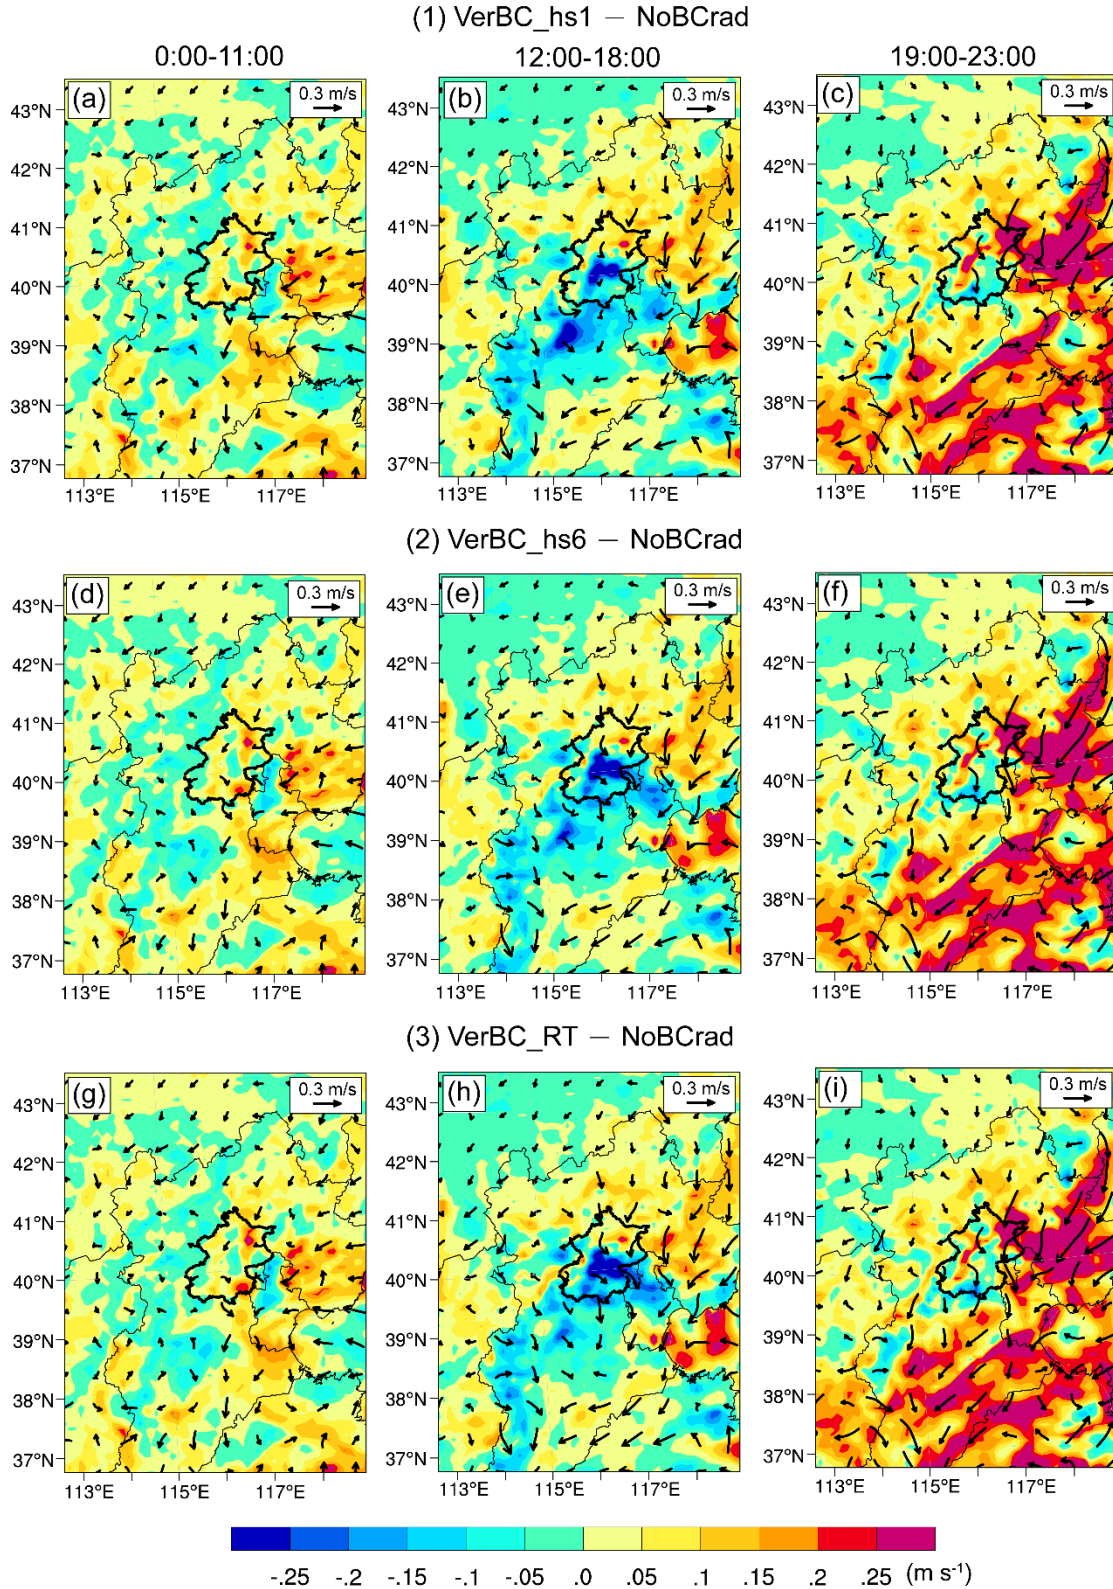

46

47 **Figure S6.** The spatial distributions of changes in wind at 10 m due to BC DRE with  
 48 two exponential functions (VerBC\_hs1,6 minus NoBCrad) and one observed transport  
 49 vertical profile (VerBC\_RT minus NoBCrad) average 0:00-11:00 LT (a, d, g), 12:00-  
 50 18:00 LT (b, e, h), and 19:00-23:00 LT (c, f, i).
